# Supplementary material
Source: PubMed Central journal article supplement (PMC2522240)

## Supporting Materials

Figure S-1: Projections of normal modes onto Zinc-related bonds and angles between Gaussian (G03) and AMBER.

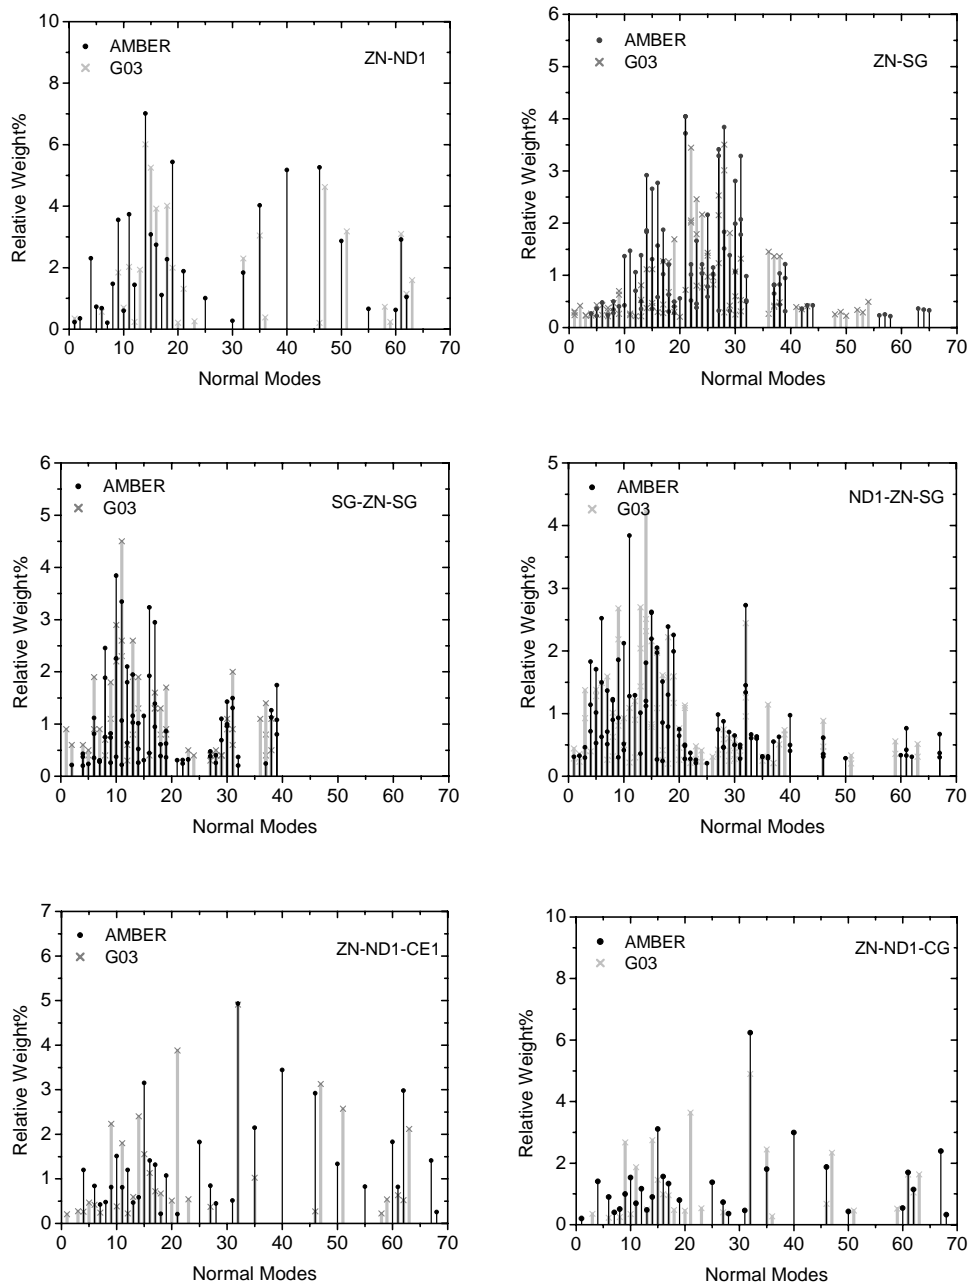

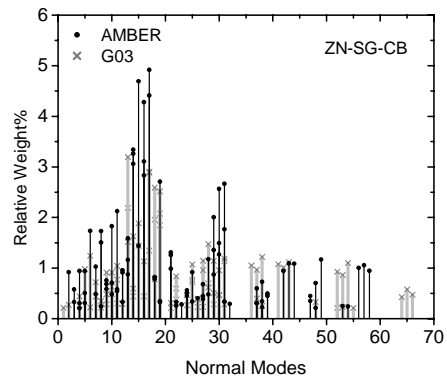

Supplement: NIHMS62648-supplement-1si20070723_03.pdf [file NIHMS62648-supplement-1si20070723_03.pdf]
